# Supplementary material for: [Retracted] A Network Pharmacology to Explore the Mechanism of Calculus Bovis in the Treatment of Ischemic Stroke
Source: Hindawi journal article supplement (doi:10.1155/2021/6611018), 2021-01-01
Supplement: f1 [file 6611018.f1.docx]

**Supplementary Materials**

**Title: A Network Pharmacology to Explore the Mechanism of Calculus Bovis in**

**the Treatment of Ischemic Stroke**

**Authors:**

Fangchen Liu,1,4Ling Li,2Jian Chen,2Ying Wu,3Yongbing Cao,2*and Ping Zhong1,3*

**Affiliations:**

*1Department of Neurology, Shanghai TCM-Integrated Hospital, Shanghai University of Traditional Chinese Medicine, Shanghai 200082, China*

*2Institute of Vascular Disease, Shanghai TCM-Integrated Hospital, Shanghai University of Traditional Chinese Medicine, Shanghai 200082, China*

*3**Department of Neurology, Shidong Hospital of Yangpu District, Shanghai 200090, China*

*4Shanghai University of Traditional Chinese Medicine, Shanghai 201203, China*

**Corresponding author:**

Ping Zhong, Department of Neurology, Shanghai TCM-Integrated Hospital, Shanghai University of Traditional Chinese Medicine, Shanghai, China

Address: 230 Baoding Road, Hongkou District, Shanghai, China, 200082

Shidong Hospital of Yangpu District, Shanghai, China

Address: 999 Shiguang Road, Yangpu District, Shanghai, China, 200090

1. mail：[zphgl@163.com](mailto:zphgl@163.com)

Yongbing Cao, Institute of Vascular Disease,Shanghai TCM-Integrated Hospital,Shanghai University of Traditional Chinese Medicine,Shanghai,China

Address: 230 Baoding Road, Hongkou District, Shanghai, China, 200082

E-mail: ybcao@vip.sina.com

**This word file includes:**

Online Table 1-2

Table S1. All ingredients of Calculus Bovis.

| Mol ID | Mol name | 2D structure | OB (%) | BBB | DL | Source |
| --- | --- | --- | --- | --- | --- | --- |
| MOL000263 | oleanolic acid | 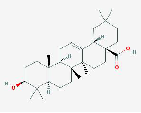 | 29.02 | 0.07 | 0.76 | TCMSP |
| MOL000298 | Ergosterol | 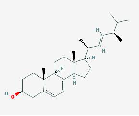 | 14.29 | 1.04 | 0.72 | TCMSP |
| MOL000511 | ursolic acid | 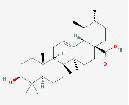 | 16.77 | 0.07 | 0.75 | TCMSP |
| MOL008834 | Bilicerdin | 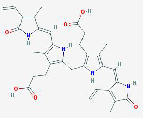 | 23.79 | -2.00 | 0.75 | TCMSP |
| MOL008835 | 1. [2-[[3-(2-carboxyethyl)-4-methyl-5-[(E)-(4-methyl-5-oxo-3-vinyl-2-pyrrolylidene)methyl]-1H-pyrrol-2-yl]methyl]-4-methyl-5-[(Z)-(3-methyl-5-oxo-4-vinyl-2-pyrrolylidene)methyl]-1H-pyrrol-3-yl]propanoic acid | 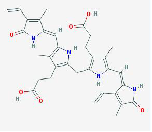 | 16.53 | -1.9 | 0.75 | TCMSP |
| MOL008836 | N-(3alpha,12alpha-dihydroxy-5beta-cholan-24-oyl)glycine | 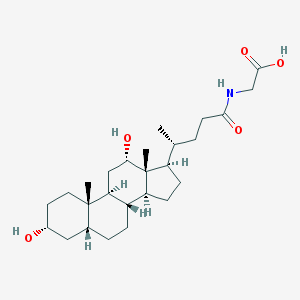 | 16.99 | -0.95 | 0.85 | TCMSP |
| MOL008837 | (2S)-2-[(2S,3S)-4-[3-[(1R)-1-(3,4-dihydroxybenzyl)-2-hydroxy-2-keto-ethoxy]-3-keto-propyl]-2-(3,4-dihydroxyphenyl)-7-hydroxy-2,3-dihydrobenzofuran-3-carbonyl]oxy-3-(3,4-dihydroxyphenyl)propionic acid | 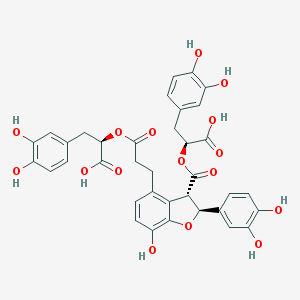 | 3.01 | -2.95 | 0.40 | TCMSP |
| MOL008838 | methyl (4R)-4-[(3R,5S,7S,8R,9S,10S ,12S,13R,14S,17R)-3,7,12-trihydroxy-10,13-dimethyl-2,3,4,5,6,7,8,9,11,12,14,15,16,17-tetradecahydro-1H- cyclopenta[a]phenanthren-17-yl] pentanoate | 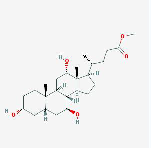 | 32.32 | -1.07 | 0.76 | TCMSP |
| MOL008839 | Methyl desoxycholate | 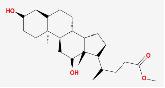 | 34.63 | -0.32 | 0.73 | TCMSP |

Table S1. *Cont.*

| MOL008840 | 2-[(3alpha,12alpha-dihydroxy-24-oxo-5beta-cholan-24-yl)amino]ethanesulfonic acid | 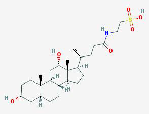 | 15.92 | -1.69 | 0.87 | TCMSP |
| --- | --- | --- | --- | --- | --- | --- |
| MOL008841 | Taurocholate | 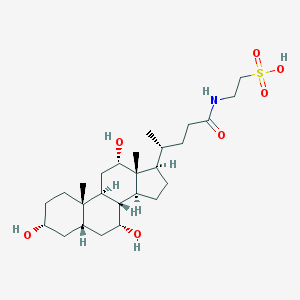 | 10.25 | -2.17 | 0.87 | TCMSP |
| MOL008842 | chenodeoxycholic acid | 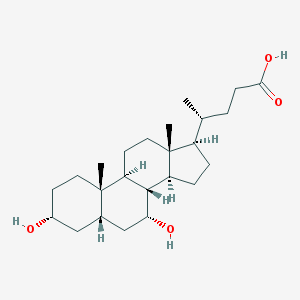 | 27.17 | -0.94 | 0.69 | TCMSP |
| MOL008843 | Cherianoine | 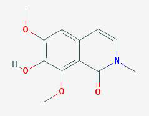 | 27.32 | 0.71 | 0.12 | TCMSP |
| MOL008844 | methyl (4R)-4-[(3R,5S,7R,8R,9S,10S,13R,14S,17R)-3,7-dihydroxy-10,13-dimethyl-2,3,4,5,6,7,8,9,11,12,14,15,16,17-tetradecahydro-1H-cyclopenta[a]phenanthren-17-yl]pentanoate | 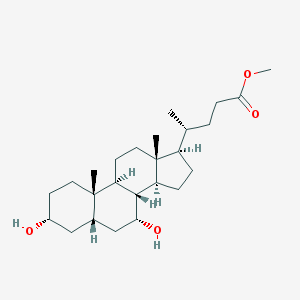 | 17.23 | -0.66 | 0.73 | TCMSP |
| MOL008845 | Deoxycholic Acid | 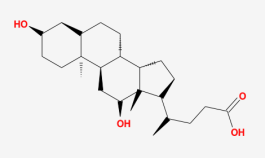 | 40.72 | -0.88 | 0.68 | TCMSP |
| MOL008846 | ZINC01280365 | 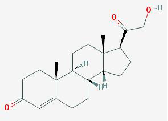 | 46.38 | -0.32 | 0.49 | TCMSP |
| MOL008847 | Isoergotamine | 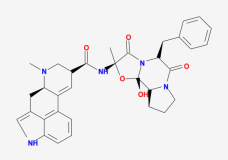 | 8.1 | -0.50 | 0.21 | TCMSP |
| MOL008848 | GCH | 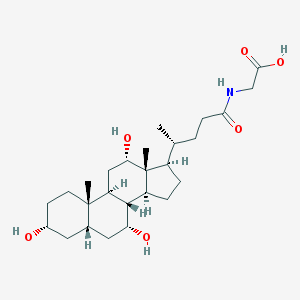 | 9.65 | -1.28 | 0.87 | TCMSP |

Table S1. *Cont.*

| MOL000953 | CLR | 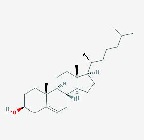 | 37.87 | 1.13 | 0.68 | TCMSP |
| --- | --- | --- | --- | --- | --- | --- |
| MOL009807 | CHD | 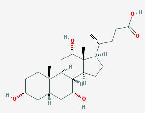 | 22.17 | -1.06 | 0.72 | BATMAN-TCM |

Abbreviations: OB, oral bio-availability; BBB, blood-brain barrier; DL: drug-likeness; Mol: molecule.

Table S2. Targets of active ingredients of Calculus Bovis.

| No. | Mol ID | Targets |
| --- | --- | --- |
| 1 | MOL000263 | PTPN1,POLB,AKR1B10,RORC,PTPRF,PTPN2,HSD11B1,ACP1,CDC25B,PDE4D,  CD81,LA2G1B,PTGES,CDC25A,NOS2,TERT,CES2,FABP1,PREP,PTPN6,PTGS2,  SCD,FABP4,PPARG,PPAR,FNTA ,FNTB,CYP19A1,FAAH,PTPN11,NR3C1,PPARD,  LTB4R,SERPINA6,SHBG,G6PD,CYP51A1,ESR2,PGR,HSD11B2,PTGS1,AR,NPC1L,SIGMAR,CYP17A1,FABP3,FABP5,PTGER2,NR1H3,PTGER4,SAE1 ,UBA2,BACE1,  CYP2C19,HMGCR,TOP1,ALOX5,PRKCH,CNR1,PTGER1,CHRM2,NR3C2,GRIK1,  GRIK2,TOP2A,CYSLTR1,MDM2,MAPK3,AGTR1,PTGIR,FFAR1,RORA,S1PR2,  HSF1,NR1H4,NR1I3,ESR1,SLC6A3,ADORA3,CES1,CCR1,OGFRL1,HMOX1,NQO1,AMY2A |
| 2 | MOL000298 | AR,VDR,GLRA1,PTPN1,NR1H3,CDC25A,PGR,NR3C1,NCOA2 |
| 3 | MOL000511 | PTPN1,POLB,AKR1B10,PTPN2,RORC,PTPRF,HSD11B1,ACP1,PDE4D,PLA2G1B,  CDC25B,CD81,PTGES,TERT,CDC25A,FABP1,NOS2,PTPN6,SCD,PPARG,PREP,  PTGS2,FNTA ,FNTB,LTB4R,CYP19A1,PTPN11,PPARA,AR,FABP4,NR3C2,NR3C1,  FAAH,SERPINA6,SHBG,CYP51A1,PPARD,PTGS1,FFAR1,ESR2,CES2,HSD11B2,  PGR,NPC1L1,SIGMAR1,CYP17A1,FABP3,FABP5,PTGER2,SAE1 ,UBA2,HMGCR,  NR1H3,SLC6A4,CYP2C19,PRKCH,TOP1,BACE1,PTGER4,ALOX5,CHRM2,NR1H4,GRIK1,G,IK2,AGTR1,MDM2,GPBAR1,RORA,PTGIR,G6PD,TOP2A,CNR1,HSF1,  MAPK3,NR1I3,PTGER1,ESR1,SLC6A3,ADORA3,CES1,PLAU,CTSB,VEGFA,BCL2,CDK4,TNF,JUN,CDK6,TP53,MAPK8,FASN,FGF2,MMP10,IL1B,SELE,PTGER3 |
| 4 | MOL008834 | ITGB1 ,ITGA4,ITGB7 ,MME,CASP3,CASP7,CASP1,ITGAV ,ITGB3,CCKBR,ECE1,  PPARG,FKBP1A,P2RY12,LTB4R,ALOX5AP,ELANE,LCK,AGTR1,EDNRA,PPARA,  HDAC1,PTPN1,GRB2,NTSR1,PTGDR2,ITGAL ,ICAM1,ITGB2,FDFT1,MMP13,  MMP3,MMP9,MMP1,MMP2,CTSA,S1PR2,CASP2,ACE,CASP8,F2,EDNRB,CASP9,  AD,M17,HSD11B1,CASP10,ITGA2B ,PYGL,CASP6,BRAF,F10,PLA2G4B,PTGIR,  CMA1,PDE5A,TBXAS1,TBXA2R,CPA1,FNTA ,FNTB,ITGA5,ACE2,CASP4,  ADORA2BPTGDR,CTSD,GCK,CAPN1,PIK3CA,CTSB,MMP12,MMP8,BACE1,  DHFR,MTOR,PIK3CG,PLEC,PTGER1,PTGER2,CDK5R1 ,CDK5,NR1H4,SLC8A1,  MAPK14,CSNK2A1,HCAR2,CSNK2A2,AURKA,CFD,PTPN2,PTPRA,AURKB,  MAPKAPK2,ITK,IKBK,MAPK1,BCL2L1,TBK1,MAPK3,ITGAL,PTGER4,TYMS,  KLKB1,PIN1,F11 |
| 5 | MOL008835 | CASP3,CASP7,CASP1,GRB2,PPARG,CCKBR,AGTR1,ITGB1 ,MME,ITGAV ,ITGB3,FKBP1A,ITGA2B ,ALB,ALOX5AP,F11,SLC8A1,MMP12,MMP8,MMP13,MMP3,  MMP2,ECE1,TBXAS1,PTPN1,PTPN2,LTA4H,ITGAL,ITGB2,ALOX5,PPARA,PTGES,EDNRA,ITGA5,HDAC6,ICAM1,HDAC1,EDNRB,MMP9,LTB4R |
| 6 | MOL008838 | CA2,CA1,HSD17B3,VDR,NR1H4,PTPN1,HMGCR,FNTA ,FNTB,HSD11B1,POLB,  GPBAR1,CDC25A,AR,CYP19A1,SHH,GABBR1,PGGT1B ,FNTA,SERPINA6,SHBG,HSD11B2,CDK8,HSP90AA1,CCR1,HCRTR2,HCRTR1,TTL,PTGFR,IDH1,PARP1,  MDM,EZH2,NR1I2,CPT1A,MME,ACKR3,GSK3A,TOP2A,MAPK8,CYP2C9,CSF1R,GSK3,G6PD,CCND1,CDK4,RPS6KB1,AURKA,PFKFB3,PRKCB,CALCRL,PIM1,  DYRK1A,CLK1,CLK3,DYRK2,IRAK4,PAK1,FABP3,FABP5,FABP2,IMPDH1,MTNR1A,MTNR1B,IMPDH2,CCNE2 ,CCNE1,GABRA3,GABRB3 ,GABRA1,GABRG2  ,GABRA5,GABRA2 ,INCENP ,AURKB,TTK,PYGL,AKR1B10,PDE3A,PDE3B,CCN, |

Table S2. *Cont.*

|  |  | PIK3C3,JAK3,ATP12A,TBXAS1,CYP3A4,MET,PDE10A,KIT,P2RX3,AVPR1A,MAPK14,PRKDC,IKBKB,MAPKAPK2,AKT2,PDPK1,KDR,CDK2,PLK1,PIK3CB,MARK2,AKT1,CDC42BPA,CHEK1,PLK3,INSR,NR3C2,NCOA2 |
| --- | --- | --- |
| 7 | MOL008839 | CA2,CA1,HSD17B3,VDR,NR1H4,PGR,NCOA2,NCOA1 |
| 8 | MOL008840 | GPBAR1,NR1H4,MME,CA2,CA1,NR3C2,PGR,OPRK1 |
| 9 | MOL008843 | ADORA2A,KDR,SRC,AKR1C3,DAO,EGFR,CCNE1 ,HMGCR,LDHA,HTR2B,BACE1,  ABCG2,TYMS,NAT1,CTSV,ERN1,ALPL,CDK2,CCND1,CCNE2,CCNE1,PLEC,IMPDH,  CSNK1A1,CSNK1D,CASP6,KCNMA1,CA2,IDO1,CYP19A1,CISD1,GSTA1,OPRM1,AURK,AURKA,DYRK1B,ATR,CDK4,SIRT1,JAK3,JAK2,CHRM3,CHRM1,SCN5A,ALOX5,PTGS2,PDE3A,ADRA1B,SLC6A4,GABRA1,CHRNA7,PRKACA,GRIA2,GABRA6 |
| 10 | MOL008846 | SERPINA6,SHBG,AR,PGR,CYP19A1,CYP17A1,NR3C1,SLC6A3,ADORA3,MAPK3,  SIGMAR1,HSD11B1,NPC1L1,NR3C2,ESR2,CDC25A,SRD5A2,PRKCH,SRD5A1,  PTPN11,AKR1B10,IDO1,PTGES,HSD11B2,ALOX5,ESR1,BACE1,RORA,G6PD,NOS2,  HSD17B3,HMGCR,PTPN1,FNTA,FNTB,SLC6A4,CES2,CES1,PTPN6,BCHEFDFT1,  POLB,PTPN2,NR1H3,NR1I,PTGS1,FABP4,PPARA,FABP3,FABP5,PPARD,NR1I3,  AKR1C3,CYP51A1,FAAH,PPARG,PTPRF,PLA2G1B,ACP1,CNR1,PSEN2 ,PSENEN,  NCSTN,APH1A ,PSEN1,APH1B,CYP2C19,JAK2,KCNA5,AKR1C1,PARP1,F2R,  HSD17B2,PIM1,JAK1,S1PR1,PIM3,C5AR1,PTGS2,CDC25B,CD81,PREP,CHRM2,  ADAM17,CCR5,KCNA3,PDE4D,FABP1,CCNB3,CCNB1,CCNB2,KCNH2,CDK,GLUL,  JAK3,TYK2,MDM2,FFAR1,HLCS,GABRB3,GABRA3,GABRG2,GABRA1,GABRA5,  GABRA2 ,GABRB3,PYGL,EDNRA,TRPA1,CENPE,TRPV1,NCOA2,NCOA1 |
| 11 | MOL000953 | AR,NPC1L1,CYP17A1,NR1H3,HMGCR,CYP51A1,SREBF2,CYP19A1,ESR2,ESR1,  SHBG,RORC,SLC6A2,SLC6A4,PTPN1,BCHE,G6PD,RORA,CHRM2,ACHE,SERPINA6,CYP2C19,NR1H2,VDR,NR1I3,PTGER1,PTGER2,CDC25A,CES2,HSD11B1,PPARD,  GLRA1,SQLE,DHCR7,PTPN6,CDC25B,PTPN2,NR3C1,SIGMAR1,DRD2,SHH,PTGES,  POLB,PREP,PGR,NR3C2,camA,NCOA2 |
| 12 | MOL009807 | NR1H4,GPBAR1,VDR,CDC25A,AKR1B10,HSD11B1,PTGER2,POLB,PTGFR,AR,  UGT2B7,SERPINA6,SHBG,HSD17B3,G6PD,GABBR1,PPARA,PPARD,NPC1L1,  GABRA2,GABRB2,GABRG2,FABP2,FNTA ,FNTB,CYP19A1,SLC22A6,HSD11B2,  FABP4,FABP3,FABP5 |
